# Supplementary material
Source: ML conference proceedings conference paper supplement (https://proceedings.mlr.press/v84/mussmann18a.html)
Supplement: Supplementary file 1 [file mussmann18a-supp.pdf]

## 6 Appendix

### 6.1 Split-neighborly proofs

**Theorem 3.2.** *If a problem is  $1/\alpha$ -split-neighborly and has a coherence parameter of  $c$ , for*

$$\beta = \min\left(c, \frac{1}{1/\alpha + 2}\right)$$

*GBS has a worst case query cost of at most  $\frac{\log n}{-\log(1-\beta)}$  and GBS has an average query cost of at most  $\frac{\log n}{H(\beta)}$  where  $H(p)$  is the entropy of a Bernoulli( $p$ ) random variable*

*Proof.* This theorem will follow from the next three lemmas.  $\square$

**Lemma 3.1.** *If a problem is  $1/\alpha$ -split-neighborly and has a coherence parameter of  $c$ , then for any  $V \subseteq \mathcal{H}$ ,  $|V| \leq 1$  or there exists a test  $x \in \mathcal{X}$  such that*

$$\mathbb{E}_{h \in V}[h(x)] \in [\beta, 1 - \beta]$$

where  $\beta$  is defined as above.

*Proof.* Fix a subset  $V \subseteq \mathcal{H}$ . Assume  $|V| > 1$ , otherwise we are done.

From the assumption, we have a coherence parameter of

$$c \geq \beta$$

From the definition, this means that there exists a probability distribution on the tests  $P$  such that for any hypothesis  $h$ ,

$$\sum_{x \in X} P(x)h(x) \in [\beta, 1 - \beta]$$

Since this is true for all  $h \in \mathcal{H}$ , this is also true for all convex combinations. Thus,

$$\mathbb{E}_{h \in V}\left[\sum_{x \in X} P(x)h(x)\right] \in [\beta, 1 - \beta]$$

$$\sum_{x \in X} P(x)\mathbb{E}_{h \in V}[h(x)] \in [\beta, 1 - \beta]$$

For simplicity, define the split constant  $S(x) = \mathbb{E}_{h \in V}[h(x)]$ . Thus,

$$\sum_{x \in X} P(x)S(x) \in [\beta, 1 - \beta]$$

There are two possibilities, either there exists a test  $x$  such that

$$S(x) = \mathbb{E}_{h \in V}[h(x)] \in [\beta, 1 - \beta]$$

in which case, this is the exact conclusion statement and we are done, or that there exists no test with a split constant in  $[\beta, 1 - \beta]$ . If there exists no test with a split constant in  $[\beta, 1 - \beta]$  but the weighted combination is in  $[\beta, 1 - \beta]$ , then there exists tests  $x$  and  $x'$  such that  $S(x) < \beta$  and  $S(x') > 1 - \beta$

Since the problem is  $1/\alpha$ -split neighborly, there exists a graph over the tests that is strongly connected. Thus, there is a path from  $x$  to  $x'$ . Since  $S(x) < \beta$  and  $S(x') > 1 - \beta$  and since  $\forall x'' \in \mathcal{X} : S(x'') \notin [\beta, 1 - \beta]$ , there must be an edge  $(x_0, x_1)$  along the path where  $S(x_0) < \beta$  and  $S(x_1) > 1 - \beta$ . Thus,

$$\Pr_{h \in V}[h(x_0) = 1] = \mathbb{E}_{h \in V}[h(x_0)] < \beta$$

$$\Pr_{h \in V}[h(x_1) = 1] = \mathbb{E}_{h \in V}[h(x_1)] > 1 - \beta$$

Combining these two yields,

$$\Pr_{h \in V}[h(x_0) = 0 \wedge h(x_1) = 1] > 1 - 2\beta$$

Recall  $\Delta(x_0, x_1) = \{h \in \mathcal{H} : h(x_0) = 0, h(x_1) = 1\}$

$$\Pr_{h \in V}[h \in \Delta(x_0, x_1)] > 1 - 2\beta$$

$$\frac{|V \cap \Delta(x_0, x_1)|}{|V|} > 1 - 2\beta$$

Recall from the definition of  $\beta$  that  $\frac{1}{1/\alpha + 2} \geq \beta$ . Thus

$$1 - 2\beta \geq 1 - 2\frac{1}{1/\alpha + 2} = \frac{1/\alpha}{1/\alpha + 2} \geq \frac{\beta}{\alpha}$$

Thus,

$$\frac{|V \cap \Delta(x_0, x_1)|}{|V|} > \frac{\beta}{\alpha}$$

For brevity, define  $\Delta = \Delta(x_0, x_1)$ . Since there is an edge  $(x_0, x_1)$  in the  $1/\alpha$ -neighborly graph, for any subset including  $V \cap \Delta \subseteq \Delta$ , either  $|V \cap \Delta| \leq 1$  or there exists a test  $\hat{x}$  such that,

$$\mathbb{E}_{h \in V \cap \Delta} [h(\hat{x})] \in [\alpha, 1 - \alpha]$$

First,  $|V \cap \Delta| \neq 0$ , since  $|V| > 1$  and  $\frac{|V \cap \Delta(x_0, x_1)|}{|V|} > \frac{\beta}{\alpha}$ . If  $|V \cap \Delta| = 1$ , then,  $\frac{|V \cap \Delta(x_0, x_1)|}{|V|} > \frac{\beta}{\alpha}$  and  $|V| > 1$  so  $\frac{1}{2} \geq \frac{1}{|V|} > \frac{\beta}{\alpha} \geq \beta$ . Since the hypotheses are identifiable, any pair of hypotheses yield a different result on some test, so we can always find a test with a split constant of at least  $\frac{1}{|V|}$ , and this implies the result of the theorem.

In the other case, where  $|V \cap \Delta| > 1$ , we have all the necessary pieces and it's just a matter of crunching the algebra.

$$\begin{aligned} \mathbb{E}_{h \in V} [h(\hat{x})] &= \frac{\sum_{h \in V} h(\hat{x})}{|V|} \\ &\geq \frac{\sum_{h \in V \cap \Delta} h(\hat{x})}{|V|} \\ &\geq \frac{\beta}{\alpha} \frac{\sum_{h \in V \cap \Delta} h(\hat{x})}{|V \cap \Delta|} \\ &\geq \frac{\beta}{\alpha} \mathbb{E}_{h \in V \cap \Delta} [h(\hat{x})] \\ &\geq \frac{\beta}{\alpha} \alpha = \beta \end{aligned}$$

Additionally,

$$\begin{aligned} \mathbb{E}_{h \in V} [h(\hat{x})] &= \frac{\sum_{h \in V} h(\hat{x})}{|V|} \\ &= \frac{\sum_{h \in V \cap \Delta} h(\hat{x}) + \sum_{h \in V \setminus \Delta} h(\hat{x})}{|V|} \\ &\leq \frac{(1 - \alpha)|V \cap \Delta| + \sum_{h \in V \setminus \Delta} h(\hat{x})}{|V|} \\ &\leq \frac{(1 - \alpha)|V \cap \Delta| + |V| - |V \cap \Delta|}{|V|} \\ &\leq 1 - \alpha \frac{|V \cap \Delta|}{|V|} \\ &\leq 1 - \alpha \frac{\beta}{\alpha} = 1 - \beta \end{aligned}$$

Thus, we have that

$$\mathbb{E}_{h \in V} [h(\hat{x})] \in [\beta, 1 - \beta]$$

which is the conclusion of the lemma.

**Lemma 6.1.** *If, for any  $V \subseteq \mathcal{H}$ ,  $|V| \leq 1$  or there exists a test  $x \in \mathcal{X}$  such that*

$$\mathbb{E}_{h \in V} [h(x)] \in [\beta, 1 - \beta]$$

*then GBS has a worst case query cost of at most  $\frac{\log n}{\log(\frac{1}{1-\beta})}$*

*Proof.* After  $m$  queries, there are at most  $\max(1, (1 - \beta)^m n)$  remaining hypotheses since greedy will choose a test with a split constant of at least  $\beta$  (a split with respect to the hypotheses without a prior) and will terminate when there is a single hypothesis. Thus, when  $(1 - \beta)^m n \leq 1$ , the algorithm must have terminated. Rearranging, we see that when  $m \geq \frac{\log n}{\log(\frac{1}{1-\beta})}$  the algorithm must have terminated. This means that the worst case query cost must be at most  $\frac{\log n}{\log(\frac{1}{1-\beta})}$ .  $\square$

**Lemma 6.2.** *If, for any  $V \subseteq \mathcal{H}$ ,  $|V| \leq 1$  or there exists a test  $x \in \mathcal{X}$  such that*

$$\mathbb{E}_{h \in V} [h(x)] \in [\beta, 1 - \beta]$$

*then GBS has an average query cost of at most  $\frac{\log n}{H(\beta)}$  where  $H(p)$  is the entropy of a Bernoulli( $p$ ) random variable*

*Proof.* Define  $H(p)$  as the entropy of a Bernoulli random variable with probability  $p$ .

$$f(V) = \mathbb{E}[\text{average queries remaining while at subset } V] \quad (1)$$

We will prove by induction on increasing subsets that

$$f(V) \leq \frac{\log(|V|)}{H(\beta)} \quad (2)$$

Note that the base case is that  $f(\{h\}) = 0$  because we are done when there is just one hypothesis left. Note that this suffices to show that the total runtime is  $\log(n)/H(\beta)$  because  $|V| = n$  at the beginning of the algorithm.

Let  $A, B$  be a partition of  $V$  based on a test split. Without loss of generality, let  $|A| \leq |B|$ , so  $|A| \leq 1/2|V|$ . Based on the recursive definition of cost and there is a test with a split constant of at least  $\beta$  (so GBS will choose a test with a split constant of at least  $\beta$ ),

$$\square \quad f(V) \leq \max_{A, B, |A|/|V| \in [\beta, 1/2]} \frac{|A|}{|V|} f(A) + \frac{|B|}{|V|} f(B) + 1$$

From the induction hypothesis,

$$\begin{aligned}
 &\leq \max_{\dots} \frac{|A| \log |A|}{|V| H(\beta)} + \frac{|B| \log |B|}{|V| H(\beta)} + 1 \\
 &\leq \frac{\max_{\dots} \frac{|A|}{|V|} \log |A| + \frac{|B|}{|V|} \log |B| + H(\beta)}{H(\beta)} \\
 &\leq \frac{\max_{\dots} \frac{|A|}{|V|} \log \frac{|A|}{|V|} + \frac{|B|}{|V|} \log \frac{|B|}{|V|} + H(\beta) + \log |V|}{H(\beta)} \\
 &\leq \frac{\max_{\dots} -H\left(\frac{|A|}{|V|}\right) + H(\beta) + \log |V|}{H(\beta)}
 \end{aligned}$$

Note that since  $|A|/|V| \in [\beta, 1/2]$  (the condition of the max),  $H\left(\frac{|A|}{|V|}\right) \geq H(\beta)$ . Thus, the max is non-positive, and thus,

$$f(V) \leq \frac{\log(|V|)}{H(\beta)}$$

Thus, we have proved the statement by induction and this suffices to show that the total runtime is at most  $\log(n)/H(\beta)$ .  $\square$

**Proposition 3.1.** *If a problem is  $k$ -neighborly and has a uniform prior, then the problem is  $k$ -split-neighborly.*

*Proof.* In the case that  $k = 1$ ,  $|\Delta(x, x')| = 1$  so  $|V| \leq 1$  so the problem is 1-split-neighborly. Assume  $k > 1$ . Note that any set of hypotheses must have a test that distinguishes at least one of the hypotheses (otherwise the hypotheses are the same). If two points  $x$  and  $x'$  in the  $k$ -neighborly graph have an edge between them, then  $|\Delta(x, x') \cup \Delta(x', x)| \leq k$ , which implies  $|\Delta(x, x')| \leq k$ , and thus either  $|\Delta(x, x')| \leq 1$  or there is a test with a  $1/k$  split constant and thus there is an edge from  $x$  to  $x'$  in the  $k$ -split-neighborly graph. By a similar argument, there is also an edge from  $x'$  to  $x$ . Since the  $k$ -neighborly graph is connected and each edge corresponds to a bidirectional edge in the  $k$ -split-neighborly graph, the  $k$ -split-neighborly graph is strongly connected and thus the problem is  $k$ -split-neighborly.  $\square$

## 6.2 Value of $k$

### 6.2.1 Disjunctions

For the disjunctions problem, for  $m \geq 2, d \geq 2m$ ,

$$\begin{aligned}
 n &= \sum_{i=1}^m \binom{d}{i} \\
 k &\geq \sum_{i=1}^m \binom{d-1}{i-1} \\
 k &\geq 1 + \sum_{i=1}^{m-1} \binom{d-1}{i} \\
 k^2 - n &\geq 1 + 2 \sum_{i=1}^{m-1} \binom{d-1}{i} + \left( \sum_{i=1}^{m-1} \binom{d-1}{i} \right)^2 \\
 &\quad - \sum_{i=1}^{m-1} \binom{d}{i} - \binom{d}{m}
 \end{aligned}$$

Note that  $2 \binom{d-1}{i} \geq \binom{d}{i}$  since  $i \leq m-1 \leq d/2$ .

$$\begin{aligned}
 k^2 - n &\geq 1 + \left( \sum_{i=1}^{m-1} \binom{d-1}{i} \right)^2 - \binom{d}{m} \\
 &\geq \binom{d-1}{m-1}^2 - \binom{d}{m} \\
 &\geq \binom{d-1}{m-1} \left( \binom{d-1}{m-1} - d/m \right)
 \end{aligned}$$

Since  $m \geq 2$ ,

$$\begin{aligned}
 &\geq \binom{d-1}{1} - d/2 \\
 &\geq d/2 - 1 \\
 &\geq m - 1 \\
 &\geq 0
 \end{aligned}$$

Thus,  $k^2 - n \geq 0$  and so  $k \geq \sqrt{n}$ .

### 6.2.2 Monotonic CNF

Note that  $n = |\mathcal{H}| = \frac{1}{l!} \binom{d}{m, m, \dots, m, d-lm}$ . All of the bit strings with strictly less than  $l$  ones will be trivially connected in the  $k$ -neighborly graph, because they yield 0 on all hypotheses. However, the closest test to connect them to the rest of the graph is the bit string  $1^l 0^{d-l} \in \mathcal{X}$ , which disagrees on  $\binom{d-l}{m-1, m-1, \dots, m-1, d-lm} \leq k$  hypotheses. We examine the case where  $d \geq 2ml$  and  $m \geq 2$ .

For the monotonic CNF formulas, recall that

$$n = |\mathcal{H}| = \frac{1}{l!} \binom{d}{m, m, \dots, m, d-lm}$$

$$k \geq \binom{d-l}{m-1, m-1, \dots, m-1, d-lm}$$

For  $d \geq 2ml$  and  $m \geq 2$ ,  $k \geq \sqrt{n}$ .

$$\binom{d-l}{m-1, m-1, \dots, m-1, d-lm} \leq k$$

and

$$\begin{aligned} n &= \frac{1}{l!} \binom{d}{m, m, \dots, m, d-lm} \\ &= \frac{1}{l!} \frac{d!}{(m!)^l (d-lm)!} \\ &= \frac{(d-l)!}{(m-1)! (d-lm)!} \frac{1}{m^l} \frac{d! (d-2l)!}{(d-l)!^2} \frac{(d-l)!}{l! (d-2l)!} \\ &\leq k \frac{1}{m^l} \frac{d! (d-2l)!}{(d-l)!^2} \binom{d-l}{l} \end{aligned}$$

Since  $d \geq 2ml \geq 4l$ ,

$$n \leq k \frac{2^l}{m^l} \binom{d-l}{l}$$

Since  $d-l \geq 2l(m-1)$  and  $m \geq 2$

$$\begin{aligned} n &\leq k \binom{d-l}{l(m-1)} \\ n &\leq k \binom{d-l}{m-1, m-1, \dots, m-1, d-lm} \\ n &\leq k^2 \\ k &\geq \sqrt{n} \end{aligned}$$

### 6.2.3 Discrete Linear Classifier

Recall that we are in the special case where  $d$  is divisible by 4,  $b = d/4 - 1$  and there are an equal number of 1 and 0 weights ( $d/2$ ).

All tests with fewer than  $d/4$  1's will yield a result of 0 for all hypotheses. The test with the next fewest hypotheses that yield 1 will be a test with exactly  $d/4$  1's. Thus,  $k$  is at least the number of such hypotheses that yield 1.

$$\begin{aligned} n &= \binom{d}{d/2} \\ k &\geq \binom{3d/4}{d/4} \end{aligned}$$

For simplicity, define  $c = d/4$ .

$$\frac{n}{k^2} \leq \frac{\binom{4c}{2c}}{\binom{3c}{c}^2}$$

$$= \frac{(4c)!c!}{(3c)!(3c)!}$$

Note that we have the common Stirling's approximation,

$$\sqrt{2\pi n} n^{n+1/2} e^{-n} \leq n! \leq e n^{n+1/2} e^{-n}$$

Thus,

$$\frac{n}{k^2} \leq \frac{e^3 (4c)^{4c+1/2} c^{c+1/2} c^{c+1/2} e^{-6c}}{2\pi (3c)^{3c+1/2} (3c)^{3c+1/2} e^{-6c}}$$

$$= \frac{2e^3 \sqrt{c} (4c)^{4c} c^c c^c}{6\pi (3c)^{3c} (3c)^{3c}}$$

$$= \frac{e^3 \sqrt{c} 4^{4c}}{3\pi 3^{3c} 3^{3c}}$$

$$= \frac{e^3}{3\pi} \sqrt{c} \left(\frac{256}{729}\right)^c$$

$$\leq 1$$

for  $c \geq 1$ .

Thus, for  $d \geq 4$ ,

$$\frac{n}{k^2} \leq 1$$

$$k \geq \sqrt{n}$$

## 6.3 Necessity of Dependencies

### 6.3.1 Linear classifiers on convex polygon data pool

For arbitrary data points where the points are not the vertices of a convex polygon, the linear classifier problem is not  $1/\alpha$ -split-neighborly for constant  $\alpha$ . A counter-example is shown in Figure 8.

### 6.3.2 Disjunctions

The linear dependence on  $m$  for the disjunctions is necessary because of the case where  $d = m + 1$ , and  $|\mathcal{H}| = d$  (each  $h \in \mathcal{H}$  lacking one variable). In this case, there are no tests with split constants of  $\frac{1}{m}$ , so the problem cannot be better than  $(m-2)$ -split-neighborly (recall coherence  $c = 1/2$ ).

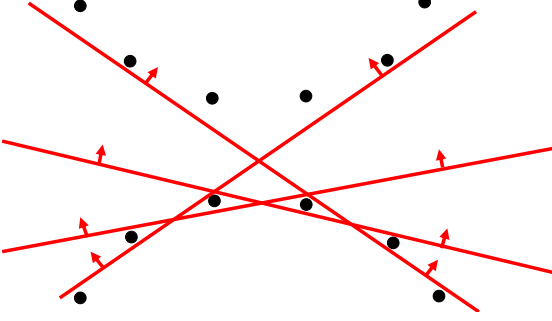

Figure 8: A counterexample that shows a non-convex data pool need not be split-neighborly. Note that we can at most split off 1 of the  $n$  hypotheses by querying one of the points from the lower half. However, the problem has coherence close to  $1/2$  and thus it cannot be  $1/\alpha$ -split-neighborly for constant  $\alpha$ .

### 6.3.3 Monotonic CNF

For the monotonic CNF problem, the linear dependence on  $m$  is necessary because of the case where  $l = 1$ ,  $d = m + 1$ , and  $|\mathcal{H}| = d$  (each  $h \in \mathcal{H}$  lacking one variable). In this case, there are no tests with split constants of  $\frac{1}{m}$ , so the problem cannot be better than  $(m - 2)$ -split-neighborly (recall coherence  $c = 1/2$ ). Furthermore, the linear dependence on  $l$  is necessary because of the problem where  $m = 1$ ,  $d = l + 1$ , and  $|\mathcal{H}| = d$  (each  $h \in \mathcal{H}$  lacking one variable). For this problem, there are no tests with split constants of  $\frac{1}{l}$ , so the problem cannot be better than  $(l - 2)$ -split-neighborly. Thus, although the linear dependence on  $m$  and  $l$  is necessary, it may be possible to improve the constants.

### 6.3.4 Object Localization

For object localization with the axis-symmetric, axis-convex set  $S$ , the dependence on  $d$  is necessary because if we use the set  $S = \{je_i : |j| \leq l, 1 \leq i \leq d\}$  and consider the set of hypotheses,  $\{\pm le_i : 1 \leq i \leq d\}$ , the problem has no test with split constant of  $\frac{1}{2d-1}$  but has coherence  $c = 1/2$ , so it can't be  $(2d - 3)$ -split-neighborly.

## 6.4 Monotonic CNF

**Theorem 4.2.** *The Conjunction of Disjunctions problem is  $(m + 1 + 3(l - 1))$ -split-neighborly.*

*Proof.* We prove this theorem by induction on  $l$ . First, for the base case  $l = 1$ .

The test graph has an edge from  $x$  to  $x'$  if  $\|x - x'\|_1 = 1$  (the bit strings differ in one location).

Let  $x^+$  be the value of  $x$  or  $x'$  with more 1's (and let

$x^-$  be the other one). Note that  $|\Delta(x^+, x^-)| = 0$  so there is a directed edge  $(x^+, x^-)$ .

For the other direction, fix a subset  $V \subseteq \Delta(x^-, x^+)$ . Without loss of generality, let  $x^+$  and  $x^-$  differ in the first coordinate so  $x_1^+ = 1$  and  $x_1^- = 0$  and  $\forall i > 1 : x_i^+ = x_i^-$ .

For a proof by contradiction, the problem is not  $(m + 1)$ -split-neighborly so that  $|V| > 1$  and there is no test  $x$  such that  $\mathbb{E}_{h \in V}[h(x)] \in [q, 1 - q]$ , where  $q = 1/(m + 1)$ .

Let

$$\mathcal{X}^+ = \{x \in \mathcal{X} : \Pr_{h \in V}[h(x) = 1] > 1 - q\},$$

$$\mathcal{X}^- = \{x \in \mathcal{X} : \Pr_{h \in V}[h(x) = 1] < q\} = \mathcal{X} - \mathcal{X}^+.$$

Let  $x'$  be the the element of  $\mathcal{X}^-$  with the fewest 0's and let the 0's be at indices  $Z$  (note  $1 \in Z$ ). If  $|Z| < m$ , then  $h(x') = 1$  for all  $h$  since the disjunctions have  $m$  variables. But since  $x' \in \mathcal{X}^-$ , which is a contradiction.

Define  $\{x^{(j)}\}_{j \in Z}$  to be the test resulting changing the  $j^{\text{th}}$  bit of  $x'$  to a 1. By the minimal definition of  $x'$ ,  $\forall j \in Z : x^{(j)} \in \mathcal{X}^+$ .

Suppose  $|Z| > m$ . Take a subset  $Z' \subseteq Z$  such that  $|Z'| = m + 1$ . Then, from the definition of  $\mathcal{X}^+$  and  $\mathcal{X}^-$ ,  $\Pr_{h \in V}[h(x') = 0 \wedge \forall j \in Z' : h(x^{(j)}) = 1] > 1 - (m + 1)q \geq 0$ , which means  $\Pr_{h \in V}[h \text{ includes variables } Z'] > 0$ . Therefore, there is a disjunction with at least  $m + 1$  variables, which is a contradiction.

Thus,  $|Z| = m$ , so there is only one hypothesis such that  $h(x') = 0$ , the hypothesis with variables at  $Z$ . So  $1/|V| > 1 - q$  (by definition of  $\mathcal{X}^-$ ), which implies  $|V| = 1$  since  $q \leq 1/2$ , which is a contradiction. Thus, by contradiction, the problem with  $l = 1$  is  $(m + 1)$ -split-neighborly. For  $l > 1$ , we proceed by induction. We can define the graph as above, define  $\mathcal{X}^-$  and  $\mathcal{X}^+$  as above, and  $x'$  and  $Z$  as above. The same argument goes through that  $|Z| = m$ . Thus,  $(1 - q)$  proportion of the hypotheses have a disjunction with variables at the indices  $Z$ . These hypotheses are simply another copy of the problem with  $l - 1$  conjunctions and  $d - m$  variables. Since that problem has  $1/2$  coherence and is  $m + 1 + 3(l - 2)$ -splittable (by induction hypothesis), there exists some test with a split constant of  $\frac{1}{m+1+3(l-2)+2}$  for a total split constant on the original problem of

$$(1 - q) \frac{1}{m + 1 + 3(l - 2) + 2} = \frac{1}{m + 1 + 3(l - 1)}$$

Thus, the problem is  $m + 1 + 3(l - 1)$ -split-neighborly by induction.  $\square$

## 6.5 Box Object Localization

**Theorem 4.3.** *The object localization problem where  $S$  is a box is 4-split-neighborly.*

Notationally, refer to  $z_h$  as the integer vector for the hypothesis  $h$  and  $z_{h,i}$  to be its  $i^{\text{th}}$  component.

We begin by fixing two tests  $x$  and  $x'$  such that  $\|x - x'\|_1 = 1$ . Without loss of generality, let  $x' - x = e_1$  where  $e_1$  is the 1<sup>st</sup> elementary vector. Since the box is axis symmetric, there exists radii  $r_i \geq 0$  such that  $x - z_h \in S \Leftrightarrow \forall i : |x_i - z_{h,i}| \leq r_i$ . Without loss of generality, assume  $x = (r_1, 0, 0, \dots, 0)$  and  $x' = (r_1 + 1, 0, 0, \dots, 0)$ . Recall  $\Delta(x, x') = \{h : h(x) = 0 \wedge h(x') = 1\}$ , this implies that  $\Delta(x, x') = \{h : z_{h,1} = 0 \wedge \forall i > 1 : |z_{h,i}| \leq r_i\}$ . We will begin by fixing a subset  $V \subseteq \Delta(x, x')$ . As in all the application proofs, we will start by assuming by contradiction that there is no test with a split constant in the range  $[q, 1 - q]$  where  $q = 1/4$ . We will use this contradiction to show that the size of  $V$  is small, so that there is in fact a test with a split constant  $q$  which is a contradiction.

### 6.5.1 Majority Element

Fix a dimension  $i$ . Examine the tests  $X_i = \{je_i : j = 0, \dots, 2r_i + 1\}$  and note that for  $h \in V \subseteq \Delta(x, x')$ ,  $h(je_i) = \mathbb{1}[z_{h,i} \geq j - r_i]$ .

By the contradiction assumption,

$$\mathbb{E}_{h \in V} [h(je_i)] \notin [q, 1 - q]$$

$$\Pr_{h \in V} [z_{h,i} \geq j - r_i] \notin [q, 1 - q]$$

Since  $\Pr_{h \in V} [z_{h,i} \geq -r_i] = 1$  and  $\Pr_{h \in V} [z_{h,i} \geq r_i + 1] = 0$ , there must be some integer  $m_i$  such that

$$\Pr_{h \in V} [z_{h,i} \geq m_i] > 1 - q$$

$$\Pr_{h \in V} [z_{h,i} \geq m_i + 1] < q$$

which implies that

$$\Pr_{h \in V} [z_{h,i} = m_i] > 1 - 2q$$

Define thus, there exists a vector  $m$  such that there is a  $1 - 2q$  probability that an hypothesis'  $i^{\text{th}}$  component matches  $m$ .

### 6.5.2 Side Splits

Intuitively, we will create a sequence of tests that each remove at least half of the elements with the  $i^{\text{th}}$  component not equal to  $m$ . For each test in the sequence, the probability that the test yields 1 over the hypotheses in  $V$  must be greater than  $1 - q$  so we can prove that there aren't many elements that disagree with  $m$  at any component.

Here we recursively define sets  $S_i$ ,  $B_i$ , and  $A_i$ .  $S_i$  will be defined in terms of  $B_i$  and  $B_i$  will be defined in terms of  $S_{i-1}$ .

Define  $S_0 = V$  and for  $i > 1$ ,  $S_i = S_{i-1} - B_i$ . Noting that we could reflect the  $i^{\text{th}}$  component about  $m_i$ , without loss of generality, suppose that

$$\Pr_{h \in S_i} [z_{h,i} > m_i] \geq \Pr_{h \in S_i} [z_{h,i} < m_i]$$

Define  $B_i = \{h \in S_{i-1} : z_{h,i} > m_i\}$  and  $A_i = \{h \in S_{i-1} : z_{h,i} < m_i\}$

Note that  $|B_i| \geq |A_i|$ .

Further, there is a test  $x^{(i)} = (-r_1, \dots, -r_i, 0, \dots, 0)$  such that  $h(x^{(i)}) = 1 \Leftrightarrow h \in S_i$  and thus by the contradiction assumption,

$$\frac{|S_i|}{|S|} \notin [q, 1 - q]$$

However, since  $\Pr_{h \in V} [z_{h,i} = m_i] > 1 - 2q$ ,  $|B_i|/|V| < 2q$ . We now prove by induction that  $|S_i|/|V| > 1 - q$ . The base case is that  $|S_1|/|V| = 1 > 1 - q$ . As long as  $q \leq 1/4$ , since  $|S_{i-1}|/|V| > 1 - q$  and  $|B_i|/|V| < 2q$ ,  $|S_i|/|S| > 1 - 3q \geq q$  (since  $q = 1/4$ ) and thus by the contradiction assumption  $|S_i|/|S| > 1 - q$ .

Note that the  $B_i$  are disjoint because

$$B_i \subseteq S_i = V - B_1 - B_2 - \dots - B_{i-1}$$

$$|S_d| > (1 - q)|V|$$

$$|V - \bigsqcup_{i=1}^d B_i| > (1 - q)|V|$$

$$|V| - \sum_{i=1}^d |B_i| > (1 - q)|V|$$

$$q|V| > \sum_{i=1}^d |B_i|$$

Define the set of elements  $M' \subseteq V$  as the points with a component not equal to  $m$ . This is the union of all  $A_i$  and  $B_i$ ,

$$\begin{aligned} |M'| &= \left| \bigcup_{i=1}^d A_i \cup \bigcup_{i=1}^d B_i \right| \\ &\leq \sum_{i=1}^d |A_i| + \sum_{i=1}^d |B_i| \\ &\leq 2 \sum_{i=1}^d |B_i| \\ &< 2q|V| \end{aligned}$$

Also note that  $|M'| \geq |V| - 1$  since there can only be one element that doesn't disagree with any element of  $m$ . Thus,

$$\begin{aligned} |V| - 1 &< 2q|V| \\ |V| &< \frac{1}{1-2q} \end{aligned}$$

Since  $q \leq 1/3$ , then this implies  $|V| < 3$  so there is a test with a split of  $1/3$ , which is a contradiction. So in a proof by contradiction, the problem is 4-split-neighborly.

## 6.6 Convex, axis-symmetric Shape Object Localization

**Theorem 4.4.** *If  $S$  is a bounded, axis-symmetric, axis-convex shape, the object localization problem is  $(4d+1)$ -split-neighborly.*

*Proof.* Let the test graph has an edge from  $x$  to  $x'$  if  $\|x - x'\|_1 = 1$ .

Fix a subset  $V \subseteq \Delta(x, x')$ . Without loss of generality, let  $x' = 0^d$ .  $V \subseteq \Delta(x, x') \subseteq \{h : h(x') = 1\} = \{h : z_h - x' \in S\} = \{h : z_h \in S\}$

For a proof by contradiction, the problem is not  $4d+1$ -split-neighborly so that  $|V| > 1$  and there is no test  $x$  such that  $\mathbb{E}_{h \in V}[h(x)] \in [q, 1-q]$ , where  $q = 1/(4d+1)$ .

Let

$$\begin{aligned} \mathcal{X}^+ &= \{x \in \mathcal{X} : \Pr_{h \in V}[h(x) = 1] > 1 - q\} \\ \mathcal{X}^- &= \{x \in \mathcal{X} : \Pr_{h \in V}[h(x) = 1] < q\} = \mathcal{X} - \mathcal{X}^+ \end{aligned}$$

Note that  $x' = 0^d \in \mathcal{X}^+$  since  $V \subseteq \{h : h(x') = 1\}$ .

Fix a dimension  $i$ . Examine the set of tests  $\{je_i : j \in \mathbb{Z}\}$ . From above,  $0e_i \in \mathcal{X}^+$ . Further, since  $V \subseteq \{h :$

$z_h \in S\}$  and since  $S$  is bounded, there exists some  $B \in \mathbb{Z}$  such that  $\pm Be_i \in \mathcal{X}^-$ . Thus there exists some  $c_1 \leq 0, c_2 \geq 0$  such that  $(c_1 - 1)e_i \in \mathcal{X}^-$ ,  $c_1 e_i \in \mathcal{X}^+$ ,  $c_2 e_i \in \mathcal{X}^+$ ,  $(c_2 + 1)e_i \in \mathcal{X}^-$ . From the definition of  $\mathcal{X}^+$  and  $\mathcal{X}^-$ ,

$$\begin{aligned} \Pr_{h \in V}[h((c_1 - 1)e_i) = 0, h(c_1 e_i) = 1, \dots \\ h(c_2 e_i) = 1, h((c_2 + 1)e_i) = 0] > 1 - 4q \end{aligned}$$

Define  $S_l = \{s_{-i} : s_i = l, s \in S\}$  to be the slices of  $S$  along axis  $i$  at location  $l$ . Therefore,  $h(je_i) = 1 \leftrightarrow z_{h, -i} \in S_{z_{h, i} - j}$ .

Note that  $S_{-l} = S_l$  since the shape  $S$  is axis symmetric. Combining these three facts,

$$\begin{aligned} \Pr_{h \in V}[z_{h, -i} \in S_{|z_{h, i} - c_1|} \cap S_{|z_{h, i} - c_2|} \setminus \dots \\ \setminus (S_{|z_{h, i} - (c_1 - 1)|} \cup S_{|z_{h, i} - (c_2 + 1)|})] > 1 - 4q \end{aligned}$$

Note that for  $l' > l \geq 0$ ,  $S_{i, l'} \subseteq S_{i, l}$  because of axis-convexity. To see this, suppose there was  $t \in S_{i, l'} \setminus S_{i, l}$ , then there would be three elements  $s^{(-1)}, s^{(0)}, s^{(1)}$  such that  $s_{-i}^{(j)} = t$  and  $s_i^{(-1)} = -l', s_i^{(0)} = l, s_i^{(1)} = l'$ , which would imply  $s^{(-1)} \in S, s^{(0)} \notin S, s^{(1)} \in S$  which contradicts axis-convexity.

Thus, in order for the set composed of slices of  $S$  in the equation above to be non-empty,

$$|z_{h, i} - c_1|, |z_{h, i} - c_2| < |z_{h, i} - c_1 + 1|, |z_{h, i} - c_2 - 1|$$

it must be the case that  $z_{h, i} = \frac{c_1 + c_2}{2} \in \mathbb{Z}$  which we define to be  $m_i$ . So,

$$\Pr_{h \in V}[z_{h, i} = m_i] > 1 - 4q$$

Repeating this argument for all dimensions and combining,

$$\Pr_{h \in V}[\forall i : z_{h, i} = m_i] > 1 - 4dq$$

There is only one such element  $z_h = m$  so

$$\frac{1}{|V|} > 1 - 4dq = 1 - 4d \frac{1}{4d+1} = \frac{1}{4d+1}$$

So  $|V| < 4d+1$  so there must be a split of at least  $q$  which is a contradiction.  $\square$

## 6.7 Discrete Binary Linear Classifiers

**Theorem 4.5.** *The discrete binary linear classifier problem is  $\max(16, 8r)$ -split-neighborly.*

Define  $q = \min(\frac{1}{16}, \frac{1}{8r})$

Recall that for the Discrete Binary Linear Classifier case, we have hypotheses as a pair of vectors and threshold  $h = (w_h, b_h) \in \{-1, 0, 1\}^d \times \mathbb{Z}$  and tests as vectors  $\{0, 1\}^d$ . Recall  $h(x) = \mathbb{1}[w_h \cdot x > b_h]$ .

From the problem setting of Discrete Binary Linear Classifiers, we know that,

$$\begin{aligned} w_h^{(+)} - b &\leq r(w_h^{(-)} + b) - \frac{d}{8} \\ w_h^{(-)} + b &\leq r(w_h^{(+)} - b - 1) - \frac{d}{8} \end{aligned}$$

Recall  $w^{(+)}$  is the number of positive elements of  $w$  and  $w^{(-)}$  is the number of negative elements. Notationally  $w_{h,i}$  refers to the  $i^{\text{th}}$  component of  $w_h$ .

### 6.7.1 Key Lemma and its Sufficiency

We will first state a lemma and then prove that it implies the problem stated.

**Lemma 6.3.** *Define*

$$x^{(0)} = (0, 0, \dots, 0)$$

$$x^{(1)} = (1, 0, \dots, 0)$$

$$H' = \{h \in H : h(x^{(0)}) = 0 \wedge h(x^{(1)}) = 1 \wedge \dots$$

$$\wedge w_h^{(+)} \leq r w_h^{(-)} - \frac{d}{8} \wedge \dots$$

$$\dots \wedge w_h^{(-)} \leq r(w_h^{(+)} - 1) - \frac{d}{8}\}$$

*For any subset  $V \subset H'$ , there exists a test  $x$  such that  $\mathbb{E}_{h \in V}[h(x)] \in [q, 1 - q]$*

### 6.7.2 Proof of Theorem 4.5 from Lemma 6.3

We will prove Theorem 4.5 by a reduction to Lemma 6.3. To show that the problem is  $1/\alpha$ -split-neighborly, we need to show that for two tests with  $x$  and  $x'$  with  $\|x - x'\|_1 = 1$  that for any subset  $V \subseteq \Delta(x, x') = \{h : h(x) = 0 \wedge h(x') = 1\}$ , that  $|V| \leq 1$  or there exists a test  $\hat{x}$  such that

$$\Pr_{h \in V}[h(\hat{x}) = 1] \in [q, 1 - q]$$

Note that by permuting the indices of  $x$  and  $x'$ , we can make the first index the one that is different between  $x$  and  $x'$ . Additionally, for the remaining indices we can

flip the 0's and 1's of the test so long as we flip the non-zero entries of  $w_h$  at that same position, and change  $b_h$  accordingly. We flip the bits so that  $x$  becomes  $x^{(0)}$  and  $x'$  becomes  $x^{(1)}$ .

Note that  $h(x^{(0)}) = 0$  implies that  $0 \leq b_h$ . Further note that,  $h(x^{(1)}) = 1$  implies that  $w_{h,1} > b_h$ . Thus, the only possibility is that  $w_{h,1} = 1$  and  $b_h = 0$ .

Let  $T_{+-}$  denote the number of flips from positive to negative weights and let  $T_{-+}$  denote the number of flips from negative to positive. Then, the weights for the new (reduction) problem will be

$$\begin{aligned} w_{new}^{(+)} &= w^{(+)} + T_{-+} - T_{+-} \\ w_{new}^{(-)} &= w^{(-)} + T_{+-} - T_{-+} \\ 0 &= b_{new} = b - T_{+-} + T_{-+} \end{aligned}$$

From the last equation,  $b = T_{+-} - T_{-+}$ . Thus,

$$\begin{aligned} w_{new}^{(+)} &= w^{(+)} - b \\ w_{new}^{(-)} &= w^{(-)} + b \end{aligned}$$

Since,

$$\begin{aligned} w^{(+)} - b &\leq r(w^{(-)} + b) - \frac{d}{8} \\ w^{(-)} + b &\leq r(w^{(+)} - b - 1) - \frac{d}{8} \end{aligned}$$

then,

$$\begin{aligned} w_{new}^{(+)} &\leq r w_{new}^{(-)} - \frac{1}{8}d \\ w_{new}^{(-)} &\leq r(w_{new}^{(+)} - 1) - \frac{1}{8}d \end{aligned}$$

We can see that the hypothesis conditions for the original theorem imply that  $\Delta(x^{(0)}, x^{(1)})$  is a subset of the hypotheses that satisfy the conditions based on  $w_{new}^{(-)}$  and  $w_{new}^{(+)}$  so Lemma 6.3 implies the binary linear classifier is  $1/q$ -split-neighborly which means  $\max(16, 8r)$ -split-neighborly.

### 6.7.3 Proof of Lemma 6.3

The remainder of this is devoted to proving Lemma 6.3

We begin by fixing a subset  $V \subseteq H'$ . As in all the application proofs, we will start by assuming by contradiction that there is no test with a split constant in the range  $[q, 1 - q]$ . We will use this contradiction to show that the size of  $V$  is small.



Recall that  $b_h = 0$  for all hypotheses in the reduced problem and  $w_{h,1} = 1$ . This follows from the fact that  $h(x^{(0)}) = 0$  and  $h(x^{(1)}) = 1$ .

#### 6.7.4 Majority Vector

Let  $e_i$  be an elementary vector with all entries 0 except for the  $i^{\text{th}}$  entry which is 1.

**Lemma 6.4.** *There exists a vector  $m \in \{-1, 0, 1\}^d$  such that  $\forall i : m_i = 0 : \Pr_{h \in V}[w_{h,i} = m_i] \geq 1 - 2q$  and  $\forall i : m_i \neq 0 : \Pr_{h \in V}[w_{h,i} = m_i] \geq 1 - q$*

*Proof.* By the contradiction assumption, there isn't a test with a split constant greater than  $q$ ,

$$\Pr_{h \in V}[w_h \cdot e_i > b_h] \notin [q, 1 - q]$$

$$\Pr_{h \in V}[w_{h,i} > 0] \notin [q, 1 - q]$$

$$\Pr_{h \in V}[w_{s,i} = 1] \notin [q, 1 - q]$$

Also, by the contradiction assumption,

$$\Pr_{h \in V}[w_h \cdot (e_0 + e_i) > b_h] \notin [q, 1 - q]$$

$$\Pr_{h \in V}[1 + w_{h,i} > 0] \notin [q, 1 - q]$$

$$\Pr_{h \in V}[w_{h,i} \neq -1] \notin [q, 1 - q]$$

$$\Pr_{h \in V}[w_{h,i} = -1] \notin [q, 1 - q]$$

Since  $\Pr_{h \in V}[w_{h,i} = 1] + \Pr_h[w_{h,i} = 0] + \Pr_h[w_{h,i} = -1] = 1$ ,

$$\Pr_{h \in V}[w_{h,i} = 0] \notin [q, 1 - 2q]$$

Thus, each index is either mostly 1, mostly 0, or mostly -1 for elements in  $S$  (since  $q < 1/3$ ). Define  $m \in \{-1, 0, 1\}^d$  such that

$$m_i = \operatorname{argmax}_c \Pr_{h \in V}[w_{h,i} = c]$$

□

Note that  $m_1 = 1$ .

#### 6.7.5 Ratio between $m^{(-)}$ and $m^{(+)}$

Note,

$$\begin{aligned} \mathbb{E}_{h \in V}[w_h^{(+)}] &= \sum_{i=1}^d \Pr[w_{h,i} = 1] \\ &\leq (q)(d - m^{(+)} + (1)m^{(+)} = qd + (1 - q)m^{(+)} \\ m^{(+)} &\geq \frac{1}{1 - q}(\mathbb{E}_{h \in V}[w_h^{(+)}] - qd) \end{aligned}$$

Further note,

$$\begin{aligned} \mathbb{E}_{h \in V}[w_h^{(+)}] &= \sum_{i=1}^d \Pr[w_{h,i} = 1] \\ &\geq (0)(d - m^{(+)} + (1 - q)m^{(+)} = (1 - q)m^{(+)} \\ m^{(+)} &\leq \frac{1}{1 - q}\mathbb{E}_{h \in V}[w_h^{(+)}] \end{aligned}$$

We have similar equations for  $m^{(-)}$  and  $\mathbb{E}_{h \in V}[w_h^{(-)}]$

Let  $\bar{m}$  be the vector of  $m$  without the first component.

Recall that we have

$$\begin{aligned} \forall h \in V : w_h^{(+)} &\leq r w_h^{(-)} - \frac{1}{8}d \\ \mathbb{E}_{h \in V}[w_h^{(+)}] &\leq r \mathbb{E}_{h \in V}[w_h^{(-)}] - qrd \\ \frac{1}{1 - q}\mathbb{E}_{h \in V}[w_h^{(+)}] &\leq r \frac{1}{1 - q}(\mathbb{E}_{h \in V}[w_h^{(-)}] - qd) \\ m^{(+)} &\leq r m^{(-)} \\ \bar{m}^{(+)} &\leq r \bar{m}^{(-)} \end{aligned}$$

Also, recall,

$$\begin{aligned} \forall h \in V : w_h^{(-)} &\leq r(w_h^{(+)} - 1) - \frac{1}{8}d \\ \mathbb{E}_{h \in V}[w_h^{(-)}] &\leq r \mathbb{E}_{h \in V}[w_h^{(+)}] - qrd - r \\ \frac{1}{1 - q}\mathbb{E}_{h \in V}[w_h^{(-)}] &\leq r \frac{1}{1 - q}(\mathbb{E}_{h \in V}[w_h^{(+)}] - qd) - \frac{r}{1 - q} \\ m^{(-)} &\leq r m^{(+)} - \frac{r}{1 - q} \\ m^{(-)} &\leq r(m^{(+)} - 1) \\ \bar{m}^{(-)} &\leq r \bar{m}^{(+)} \end{aligned}$$

### 6.7.6 Partition

Let  $\bar{w}$  be the vector of  $w$  without the first component.

**Definition 6.1.** *Let*

- $\mathcal{X}^+ = \{x : \Pr_{h \in V}[\bar{w}_h \cdot x \geq 1] > 1 - q\}$
- $\mathcal{X}^0 = \{x : \Pr_{h \in V}[\bar{w}_h \cdot x = 0] > 1 - 2q\}$
- $\mathcal{X}^- = \{x : \Pr_{h \in V}[\bar{w}_h \cdot x \leq -1] > 1 - q\}$

**Lemma 6.5.**  $\mathcal{X}^+, \mathcal{X}^0, \mathcal{X}^-$  is a partition of  $\{0, 1\}^{d-1}$

*Proof.* Since  $q \leq 1/4$  and the three defining events are mutually exclusive. It is clear that  $\mathcal{X}^+, \mathcal{X}^0, \mathcal{X}^-$  are disjoint. Next we show that every point is in at least one of the sets. Suppose a point  $x$  is in neither  $\mathcal{X}^+$  or  $\mathcal{X}^-$ .

Using the contradiction assumption on the test  $(0, x)$ ,

$$\begin{aligned} \Pr_{h \in V}[w_h \cdot (0, x) > 0] &\notin [q, 1 - q] \\ \Pr_{h \in V}[\bar{w}_h \cdot x > 0] &\notin [q, 1 - q] \\ \Pr_{h \in V}[\bar{w}_h \cdot x > 0] &< q \end{aligned}$$

Using the contradiction assumption on the test  $(1, x)$ ,

$$\begin{aligned} \Pr_{h \in V}[w_h \cdot (1, x) > 0] &\notin [q, 1 - q] \\ \Pr_{h \in V}[1 + \bar{w}_h \cdot x > 0] &\notin [q, 1 - q] \\ \Pr_{h \in V}[\bar{w}_h \cdot x \geq 0] &\notin [q, 1 - q] \\ \Pr_{h \in V}[\bar{w}_h \cdot x < 0] &< q \end{aligned}$$

Combining these,

$$\begin{aligned} \Pr_{h \in V}[\bar{w}_h \cdot x = 0] &= 1 - \Pr_{h \in V}[\bar{w}_h \cdot x > 0] - \Pr_{h \in V}[\bar{w}_h \cdot x < 0] \\ &> 1 - 2q \end{aligned}$$

Thus,  $x \notin \mathcal{X}^+$  and  $x \notin \mathcal{X}^-$  imply  $x \in \mathcal{X}^0$  so the three sets are a partition.  $\square$

**Definition 6.2.** *Define  $\mathcal{X}^*$  to be every  $x \in \{0, 1\}^d$  that  $(\bar{m} = 1) \cdot x = (\bar{m} = -1) \cdot x$ , where  $(\bar{m} = 1)$  is the element-wise boolean function.*

Intuitively, this means that there are as many ones of  $x$  in positions where  $\bar{m} = 1$  as there are places where  $\bar{m} = -1$ .

**Lemma 6.6.**  $\mathcal{X}^* \subseteq \mathcal{X}^0$

*Proof.* We prove this by induction on the number of 1's in  $x$  for  $x \in \mathcal{X}^*$ .

The base case is  $x = 0^d$  which is trivially in  $\mathcal{X}^0$ .

For other  $x$ , suppose  $x_i = 1$  at a location where  $m_i = 0$ . Then we know  $x - e_i \in \mathcal{X}^0$  by the induction hypothesis.

$$\begin{aligned} \Pr_{h \in V}[w_h \cdot (x - e_i) = 0] &> 1 - 2q \\ \Pr_{h \in V}[w_{h,i} = 0] &> 1 - 2q \end{aligned}$$

From these,

$$\Pr_{h \in V}[w_h \cdot x = 0] > 1 - 4q \geq q$$

for  $q \leq 1/5$ . So  $x \notin \mathcal{X}^+ \cup \mathcal{X}^-$  and thus  $x \in \mathcal{X}^0$ .

The only other case is where  $x_i = x_j = 1$  at locations where  $m_i = 1$  and  $m_j = -1$ . Then we know  $x - e_i - e_j \in \mathcal{X}^0$  from the induction hypothesis.

$$\begin{aligned} \Pr_{h \in V}[w_h \cdot (x - e_i - e_j) = 0] &> 1 - 2q \\ \Pr_{h \in V}[w_{h,i} = 1] &> 1 - q \\ \Pr_{h \in V}[w_{h,j} = -1] &> 1 - q \end{aligned}$$

From these,

$$\Pr_{h \in V}[w_h \cdot x = 0] > 1 - 4q \geq q$$

and similarly,  $x \in \mathcal{X}^0$ .  $\square$

### 6.7.7 Probability Distribution

We now define a probability distribution over  $x \in \mathcal{X}^*$ .

Without loss of generality, suppose  $\bar{m}^{(+)} \geq \bar{m}^{(-)}$ .

- Randomly draw an injection  $f : \{i : \bar{m}_i = -1\} \rightarrow \{i : \bar{m}_i = 1\}$ .
- Initialize  $x = 0^{d-1}$
- For indices  $\{i : \bar{m}_i \leq 0\}$ , draw  $x_i \sim \text{bernoulli}(1/2)$ .
- For  $\{i : \bar{m}_i = -1\}$ , set  $x_{f(i)} = x_i$

Note that the result  $x \in \mathcal{X}^*$  because of the pairing  $f$ , there will be a 1 where  $\bar{m}_i = 1$  for each 1 where  $\bar{m}_i = -1$ .

## 6.7.8 Set T

**Definition 6.3.** For the probability distribution,

$$Q(h) = \Pr_{x \in \mathcal{X}^*} [w_h \cdot x = 0]$$

**Lemma 6.7.** Let  $T = \{h \in V : Q(h) > 1 - 4q\}$ , then  $|V| > 5|T|$ .

*Proof.* For  $x \in \mathcal{X}^*$ , since  $\mathcal{X}^* \subseteq \mathcal{X}^0$ ,

$$\begin{aligned} \Pr_{h \in V} [w_h \cdot x = 0] &> 1 - 2q \\ \frac{\sum_{h \in V} \mathbb{1}[w_h \cdot x = 0]}{|V|} &> 1 - 2q \\ \sum_{x \in \mathcal{X}^0} P(x) \frac{\sum_{h \in V} \mathbb{1}[w_h \cdot x = 0]}{|V|} &> 1 - 2q \\ \frac{\sum_{h \in V} \sum_{x \in \mathcal{X}^0} P(x) \mathbb{1}[w_h \cdot x = 0]}{|V|} &> 1 - 2q \\ \frac{\sum_{h \in V} Q(h)}{|V|} &> 1 - 2q \\ \frac{|T|}{|V|} (1) + \frac{|V| - |T|}{|V|} (1 - 4q) &> 1 - 2q \end{aligned}$$

$$2|T| > |V|$$

□

**Lemma 6.8.**  $|T| \leq 3$

*Proof.* Recall that  $\bar{m}^{(+)} \leq r\bar{m}^{(-)}$  and  $\bar{m}^{(-)} \leq r\bar{m}^{(+)}$  as well

Also  $1 - 4q \geq 1 - \min(\frac{1}{4}, \frac{1}{2r})$  since  $q \leq \min(\frac{1}{16}, \frac{1}{8r})$

For any  $t \in T$ ,  $Q(t) > 1 - 4q \geq 1 - \min(\frac{1}{4}, \frac{1}{2r})$ . Define  $\text{Ber}(1/2)$  to be a Bernoulli random variable.

$$\begin{aligned} \Pr_{x \in \mathcal{X}^*} [w_t \cdot x = 0] &> 1 - \min(\frac{1}{4}, \frac{1}{2r}) \\ \mathbb{E}_f [\Pr[\sum_{i: \bar{m}_i=0} w_{t,i} \text{Ber}(1/2) + \dots \\ \sum_{i: \bar{m}_i=-1} (w_{t,i} + w_{t,f(i)}) \text{Ber}(1/2) = 0]] &> 1 - \min(\frac{1}{4}, \frac{1}{2r}) \end{aligned}$$

Note that

$$\begin{aligned} \Pr[\sum_{i: \bar{m}_i=0} w_{t,i} \text{Ber}(1/2) + \dots \\ \sum_{i: \bar{m}_i=-1} (w_{t,i} + w_{t,f(i)}) \text{Ber}(1/2) = 0] &\leq \frac{1}{2} \end{aligned}$$

unless  $\forall i : \bar{m}_i = 0 : w_{t,i} = 0$  and  $\forall i : \bar{m}_i = -1 : w_{t,i} + w_{t,f(i)} = 0$ , call this *condition*( $t, f$ ).

$$\mathbb{E}_f [\mathbb{1}[\text{condition}(t, f)] + \dots$$

$$\frac{1}{2} (1 - \mathbb{1}[\text{condition}(t, f)]) > 1 - \min(\frac{1}{4}, \frac{1}{2r})$$

$$\Pr_f [\text{condition}(t, f)] > 1 - \min(\frac{1}{2}, \frac{1}{r})$$

If  $\bar{m}^{(-)} = 0$ , then  $\bar{m}^{(+)} = 0$ , and thus  $\forall i : \bar{m}_i = 0 : w_{t,i} = 0$  so  $t = 0^d$  and  $|T| = 1 \leq 3$ .

Note that  $\Pr_f [\text{condition}(t, f)] > 1/2$  implies that  $\forall i : \bar{m}_i = 0 : w_{t,i} = 0$ .

**Lemma 6.9.** If there exists  $i, j$  such that  $\bar{m}_i = \bar{m}_j = -1$ , then  $w_{t,i} = w_{t,j}$ .

*Proof.*  $\Pr_f [\text{condition}(t, f)] > \frac{1}{2}$  means that

$$\Pr_f [w_{t,i} = -w_{t,f(i)}] > \frac{1}{2}$$

$$\Pr_f [w_{t,j} = -w_{t,f(j)}] > \frac{1}{2}$$

so

$$\frac{\{l : \bar{m}_l = 1 \wedge w_{t,l} = -w_{t,i}\}}{\{l : \bar{m}_l = -1\}} > 1/2$$

$$\frac{\{l : \bar{m}_l = 1 \wedge w_{t,l} = -w_{t,j}\}}{\{l : \bar{m}_l = -1\}} > 1/2$$

which is only possible if  $w_{t,i} = w_{t,j}$ . □

Thus, there is some  $c \in \{-1, 0, 1\}$  such that  $\forall i : \bar{m}_i = 1 : w_{t,i} = c$ .

$$\Pr_f [\text{condition}(t, f)] > \frac{1}{r}$$

$$\Pr_f [\forall i : \bar{m}_i = -1 : w_{t,f(i)} = -c] > 1 - \frac{1}{r}$$

$$1 - \Pr_f [\exists i : \bar{m}_i = -1 : w_{t,f(i)} \neq -c] > 1 - \frac{1}{r}$$

$$\Pr_f [\exists i : \bar{m}_i = -1 : w_{t,f(i)} \neq -c] < \frac{1}{r}$$

Suppose  $\exists j : \bar{m}_j = 1 : w_{t,j} \neq -c$ ,

$$\Pr_f [\exists i : \bar{m}_i = -1 : f(i) = j] = \frac{1}{r}$$

which is a contradiction. So  $\forall j : \bar{m}_j = 1 : w_{t,j} = -c$ .

Thus,  $c$  completely determines  $t$ . Since there are three options for  $c$ , there are three options for  $t$ , and  $|T| \leq 3$ .  $\square$

Since  $|T| \leq 3$  and  $2|T| \geq |V|$ ,  $|V| \leq 6$ . Thus, there is a split of  $1/6$  which is a contradiction since  $q \leq \frac{1}{8}$ . Thus, the lemma is proved. And thus the binary linear classifier problem is split-neighborly.
